# Supplementary material
Source: PubMed Central journal article supplement (PMC1287974)
Supplement: pnas_0504460102_2.pdf [file pnas_0504460102_2.pdf]

951 TPVHTQPPGT PLSQAAAASID NRVPTPSTVT  
981 SAETSSQQPG PDVPMLE**KT** **E**VQTDDAEPE  
1011 PTES**KGE**PRS EMMEEDLQGS SQV**KEE**TDTT  
1041 EQ**KSE**PMEVE E**KKPE**V**KVEA** **KEE**EENSSND  
1071 TASQSTSPSQ PRKKIF**KPE**E LRQALMPTLE
