# Supplementary material
Source: PubMed Central journal article supplement (PMC1287974)
Supplement: pnas_0504460102_7.pdf [file pnas_0504460102_7.pdf]

```

CBP  998 MKTEVQTDDAEPEPTESKGEPRSEMMEEDLQGS SQVKEETDT 1039
p300 976 VKMEAKMEVDQPEPADTQPEDISESKVEDCKMESTETEER-S 1016
      * *          ***          * ** **          * **
CBP 1040 TEQKSEPMVEVEKKPEVKVEAKEEEENSNDTASQSTSPSQP 1081
p300 1017 TE-----LKTEIKEEEDQPSTSATQSSPAPGQS 1044
      **          * * ****          *          * * *
CBP 1082 RKKIFKPEELRQALMPTLE 1100
p300 1045 KKKIFKPEELRQALMPTLE 1063
      *****

```
