# Supplementary material
Source: PubMed Central journal article supplement (PMC1287974)

**A**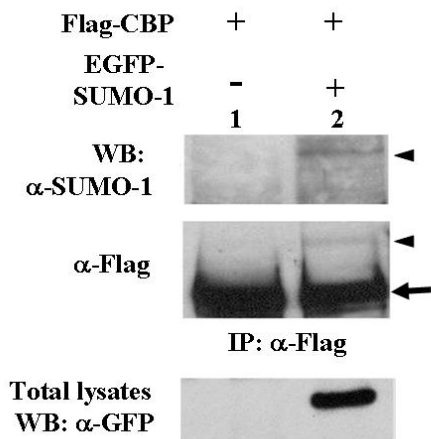**B**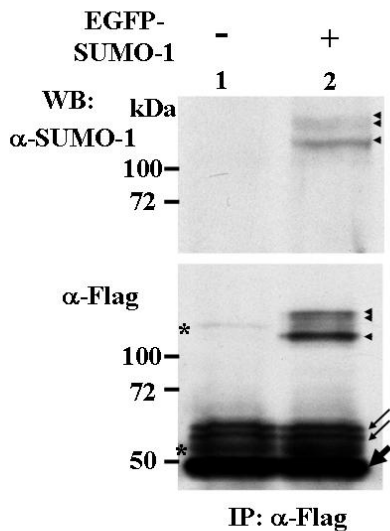**C**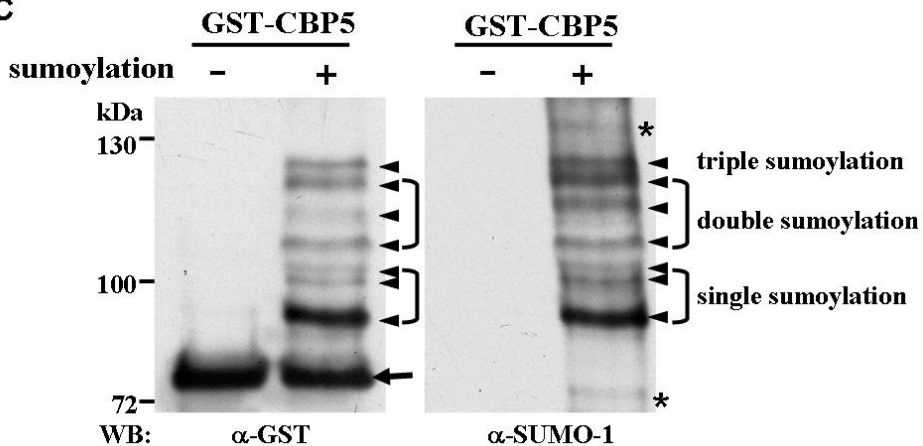

Supplement: pnas_0504460102_1.pdf [file pnas_0504460102_1.pdf]

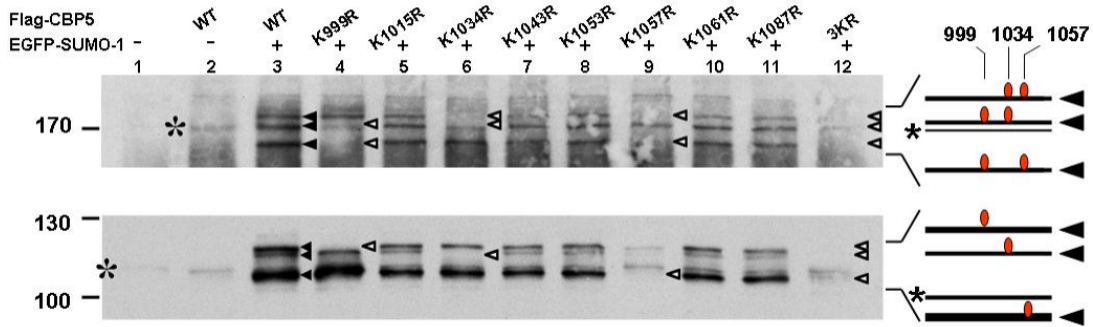

Supplement: pnas_0504460102_3.pdf [file pnas_0504460102_3.pdf]

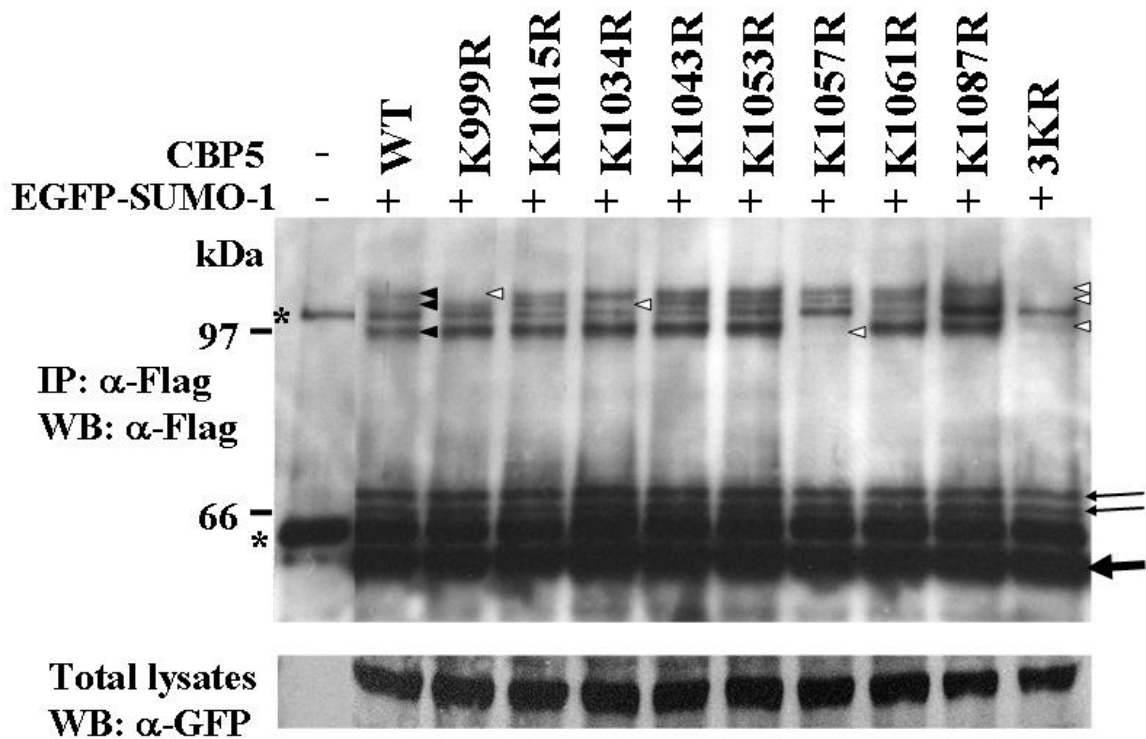

Supplement: pnas_0504460102_4.pdf [file pnas_0504460102_4.pdf]

Relative luciferase activity

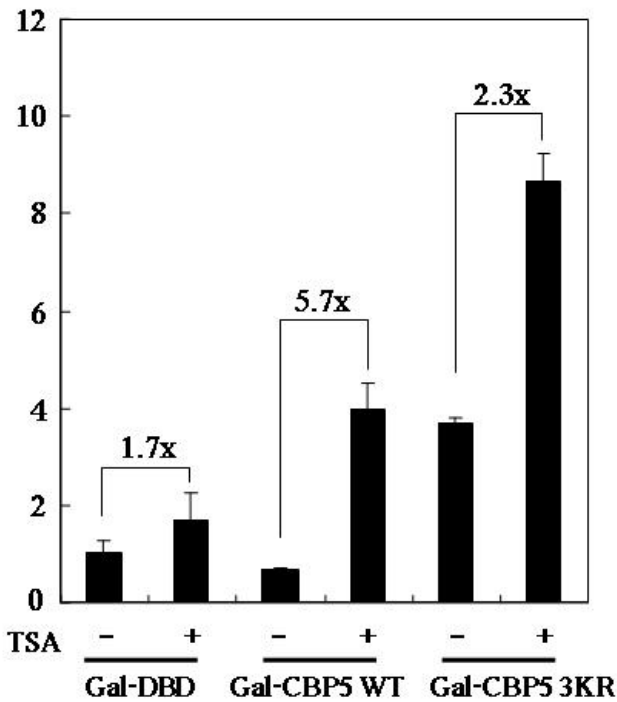

Supplement: pnas_0504460102_5.pdf [file pnas_0504460102_5.pdf]

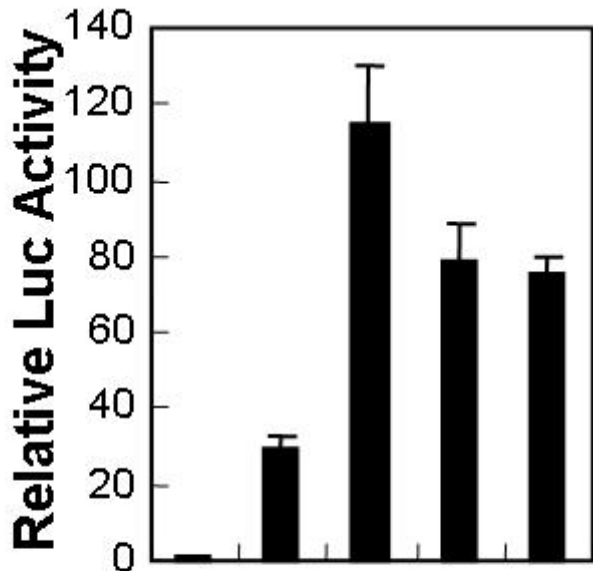

|           |   |    |   |     |   |
|-----------|---|----|---|-----|---|
|           | 1 | 2  | 3 | 4   | 5 |
| VP16-Daxx | - | -  | + | -   | + |
| Gal-CBP   | - | WT |   | 3KR |   |

Supplement: pnas_0504460102_6.pdf [file pnas_0504460102_6.pdf]
